# Supplementary material for: Age-dependent differences and similarities in the plasma proteomic signature of postoperative delirium
Source: PubMed Central journal article supplement (PMC10167206; doi:10.1038/s41598-023-34447-7), 2023-05-08
Supplement: 41598_2023_34447_MOESM1_ESM.pdf [file 41598_2023_34447_MOESM1_ESM.pdf]

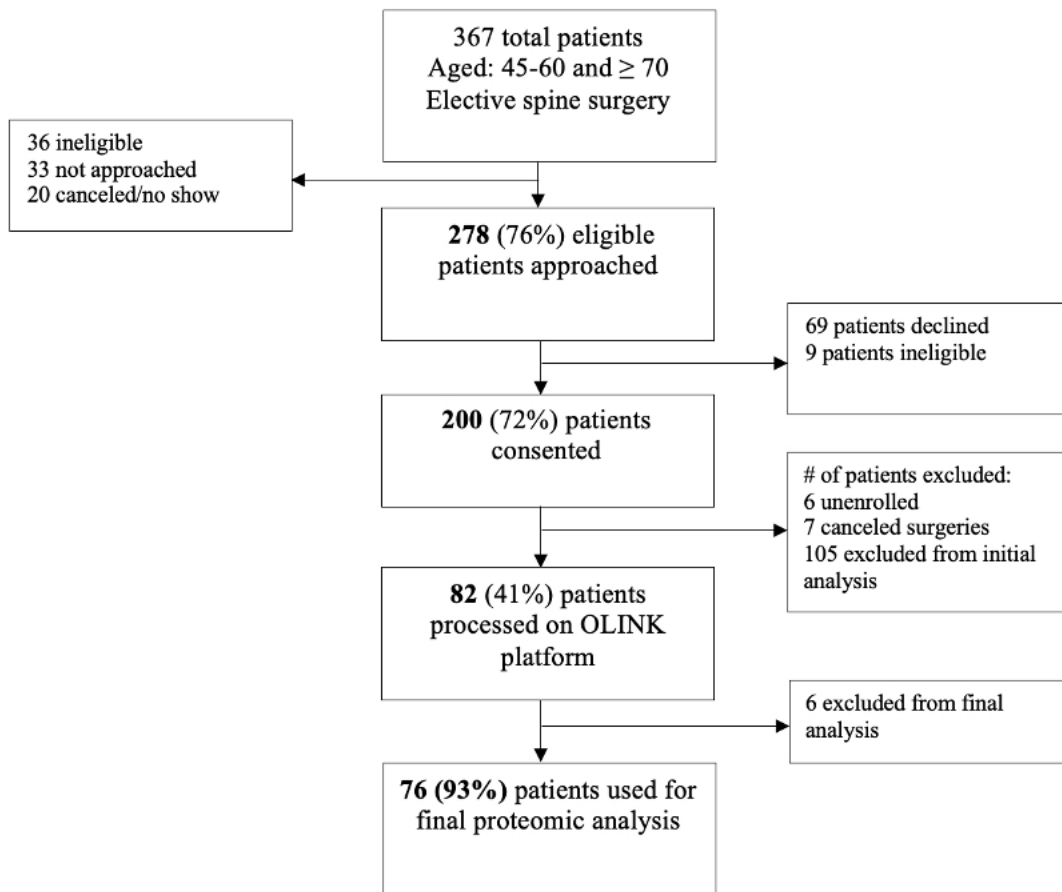

**Supplemental Figure 1.** Flow diagram of recruitment and retention.

A

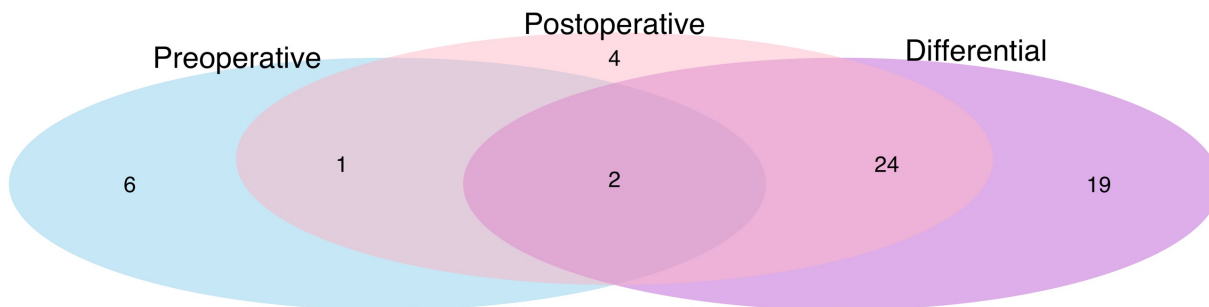

B

Preoperative Proteins

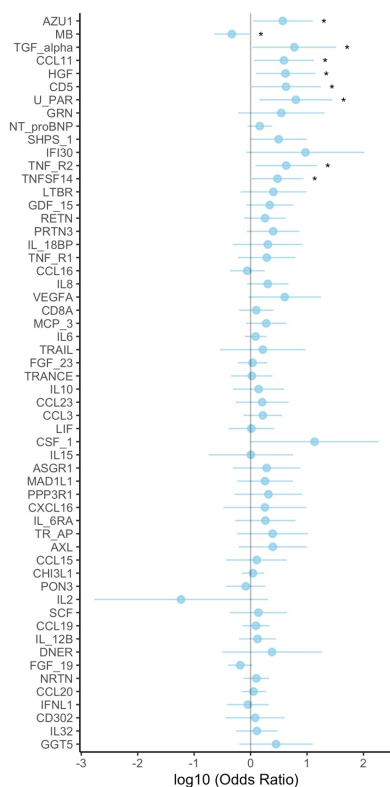

C

Postoperative Proteins

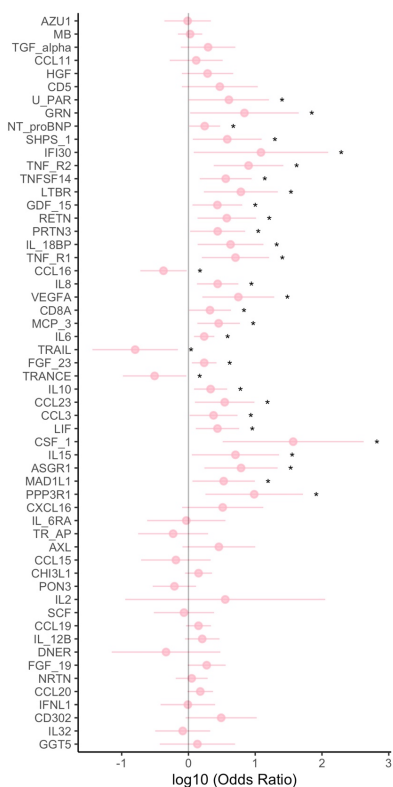

D

Differentially Expressed Proteins

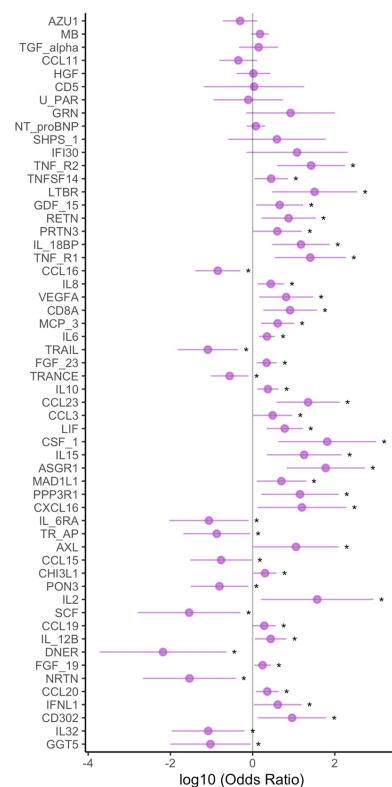

**Supplemental Figure 2.** Plasma proteins associated with postoperative delirium in spine surgery patients irrespective of age. *Data were controlled for age, sex and years of education.* (A) Venn diagrams illustrate the plasma proteins significantly associated with postoperative delirium preoperatively (n = 9 blue), postoperatively (n= 31, pink), or differentially (n = 45, purple). (B-D) Forest plots for delirium-associated plasma proteins preoperatively, postoperatively, and by pre-to postoperative change. \* denotes statistically significant proteins within each plot.

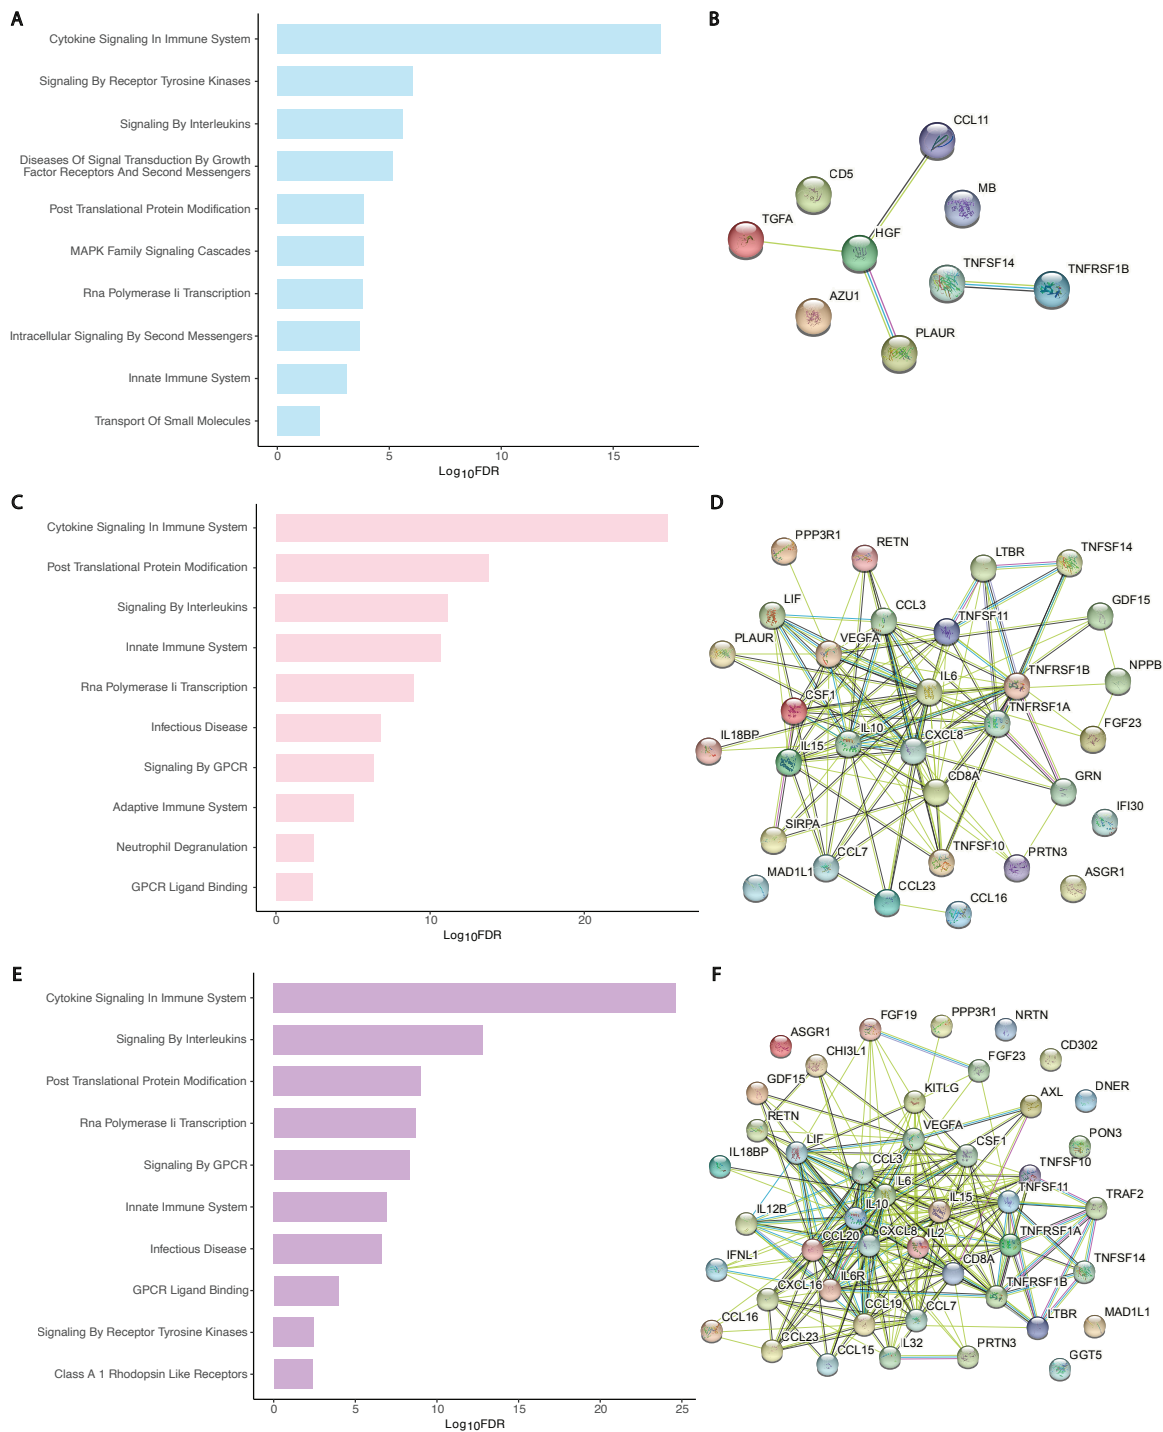

**Supplemental Figure 3.** GSEA and PPI network analysis of postoperative delirium-associated proteins in spine surgery patients irrespective of age. **Data were controlled for age, sex and years of education.** A, Bar-plots of REACTOME gene sets significantly enriched in delirium-associated proteins for preoperative period (14 gene sets; blue bars). B, Constructed PPI network for the preoperative time point (9 nodes & 4 edges, PPI enrichment < 10<sup>-2</sup>). C, Bar-plots of REACTOME gene sets significantly enriched in delirium-associated proteins for postoperative period (14 gene sets; pink bars). D, Constructed PPI network for the postoperative time point (31 nodes & 124 edges, PPI enrichment < 10<sup>-16</sup>). E., Bar-plots of REACTOME gene sets significantly enriched in delirium-associated proteins for pre- to postoperative change (15 gene sets; purple bars). F, Constructed PPI network for pre- to postoperative change (45 nodes & 240 edges, PPI enrichment < 10<sup>-16</sup>). Individual proteins in PPI networks are represented as nodes and interactions denoted by lines. For visual clarity, bar plots show a maximum of 12 of the most significant pathways.
